# Supplementary material
Source: Springer Nature journal article supplement (https://www.springermedizin.de/resource/supplementary/12887_2013_978_MOESM2_ESM.pdf/9476838)

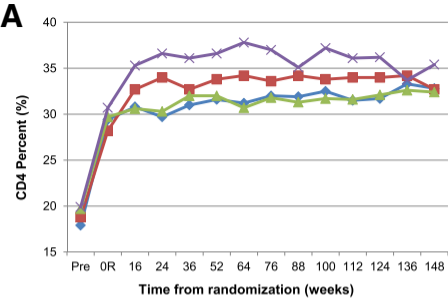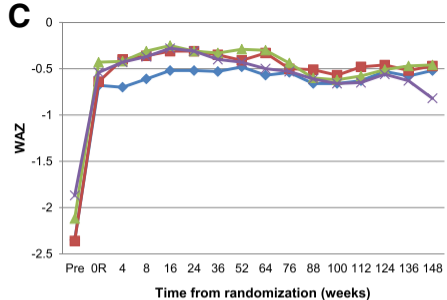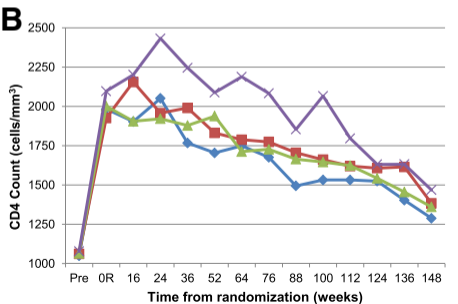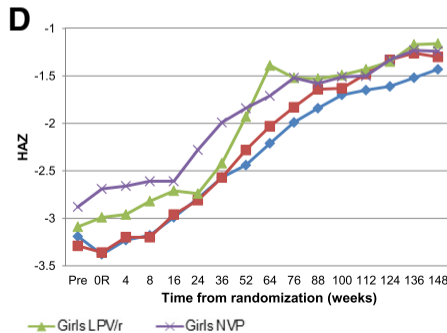

◆ Boys LPV/r   
 ■ Boys NVP   
 ▲ Girls LPV/r   
 × Girls NVP

Supplement: MOESM2 [file 9476838]
